# Supplementary material for: Reduced astrocytic reactivity in human brains and midbrain organoids with PRKN mutations
Source: PubMed Central journal article supplement (PMC7666226; doi:10.1038/s41531-020-00137-8), 2020-11-13
Supplement: 41531_2020_137_MOESM1_ESM.pdf [file 41531_2020_137_MOESM1_ESM.pdf]

## Reporting Summary

Nature Research wishes to improve the reproducibility of the work that we publish. This form provides structure for consistency and transparency in reporting. For further information on Nature Research policies, see our [Editorial Policies](#) and the [Editorial Policy Checklist](#).

### Statistics

For all statistical analyses, confirm that the following items are present in the figure legend, table legend, main text, or Methods section.

n/a Confirmed

- The exact sample size ( $n$ ) for each experimental group/condition, given as a discrete number and unit of measurement
- A statement on whether measurements were taken from distinct samples or whether the same sample was measured repeatedly
- The statistical test(s) used AND whether they are one- or two-sided  
*Only common tests should be described solely by name; describe more complex techniques in the Methods section.*
- A description of all covariates tested
- A description of any assumptions or corrections, such as tests of normality and adjustment for multiple comparisons
- A full description of the statistical parameters including central tendency (e.g. means) or other basic estimates (e.g. regression coefficient) AND variation (e.g. standard deviation) or associated estimates of uncertainty (e.g. confidence intervals)
- For null hypothesis testing, the test statistic (e.g.  $F$ ,  $t$ ,  $r$ ) with confidence intervals, effect sizes, degrees of freedom and  $P$  value noted  
*Give  $P$  values as exact values whenever suitable.*
- For Bayesian analysis, information on the choice of priors and Markov chain Monte Carlo settings
- For hierarchical and complex designs, identification of the appropriate level for tests and full reporting of outcomes
- Estimates of effect sizes (e.g. Cohen's  $d$ , Pearson's  $r$ ), indicating how they were calculated

*Our web collection on [statistics for biologists](#) contains articles on many of the points above.*

### Software and code

Policy information about [availability of computer code](#)

Data collection No software was used.

Data analysis JMP software (version 11.0.0, Cary, NC, USA), Matlab (v2017b, MathWorks, Natick, MA, USA)

For manuscripts utilizing custom algorithms or software that are central to the research but not yet described in published literature, software must be made available to editors and reviewers. We strongly encourage code deposition in a community repository (e.g. GitHub). See the Nature Research [guidelines for submitting code & software](#) for further information.

### Data

Policy information about [availability of data](#)

All manuscripts must include a [data availability statement](#). This statement should provide the following information, where applicable:

- Accession codes, unique identifiers, or web links for publicly available datasets
- A list of figures that have associated raw data
- A description of any restrictions on data availability

The data that support the findings of this study are available from the corresponding authors upon reasonable request.

## Field-specific reporting

Please select the one below that is the best fit for your research. If you are not sure, read the appropriate sections before making your selection.

Life sciences       Behavioural & social sciences       Ecological, evolutionary & environmental sciences

For a reference copy of the document with all sections, see [nature.com/documents/nr-reporting-summary-flat.pdf](https://www.nature.com/documents/nr-reporting-summary-flat.pdf)

## Life sciences study design

All studies must disclose on these points even when the disclosure is negative.

|                 |                                                                                                           |
|-----------------|-----------------------------------------------------------------------------------------------------------|
| Sample size     | Sample size were determined by the numbers we could get, because our samples were human autopsied brains. |
| Data exclusions | No data were excluded from the analyses.                                                                  |
| Replication     | We confirm all attempts at replication were successful.                                                   |
| Randomization   | Randomization is not relevant to our study because our samples were limited human autopsied brains.       |
| Blinding        | Blinding is not relevant to our study because our samples were limited human autopsied brains.            |

## Reporting for specific materials, systems and methods

We require information from authors about some types of materials, experimental systems and methods used in many studies. Here, indicate whether each material, system or method listed is relevant to your study. If you are not sure if a list item applies to your research, read the appropriate section before selecting a response.

### Materials & experimental systems

| n/a                                 | Involvement in the study                                        |
|-------------------------------------|-----------------------------------------------------------------|
| <input type="checkbox"/>            | <input checked="" type="checkbox"/> Antibodies                  |
| <input checked="" type="checkbox"/> | <input type="checkbox"/> Eukaryotic cell lines                  |
| <input checked="" type="checkbox"/> | <input type="checkbox"/> Palaeontology and archaeology          |
| <input checked="" type="checkbox"/> | <input type="checkbox"/> Animals and other organisms            |
| <input type="checkbox"/>            | <input checked="" type="checkbox"/> Human research participants |
| <input checked="" type="checkbox"/> | <input type="checkbox"/> Clinical data                          |
| <input checked="" type="checkbox"/> | <input type="checkbox"/> Dual use research of concern           |

### Methods

| n/a                                 | Involvement in the study                        |
|-------------------------------------|-------------------------------------------------|
| <input checked="" type="checkbox"/> | <input type="checkbox"/> ChIP-seq               |
| <input checked="" type="checkbox"/> | <input type="checkbox"/> Flow cytometry         |
| <input checked="" type="checkbox"/> | <input type="checkbox"/> MRI-based neuroimaging |

## Antibodies

### Antibodies used

Anti-phosphorylated  $\alpha$ -synuclein mouse monoclonal antibody, CAT# 015-29151, FUJIFILM Wako, Chuo-Ku, Osaka; clone psyn#64  
 Anti-TH mouse monoclonal antibody, CAT# T2928m, Sigma-Aldrich, St. Louis, MO, USA  
 Anti-nestin rabbit polyclonal antibody, CAT#18741, Imuno-Biological Laboratories (IBL), Fujioka, Gunma, Japan  
 Anti-GFAP mouse monoclonal antibody, CAT#11051, IBL, Fujioka, Gunma, Japan  
 Anti-vimentin mouse monoclonal antibody, CAT# GA63061-2J, Dako, Santa Clara, CA, USA  
 Anti-ALDH1L1 rabbit polyclonal antibody, CAT# 17390-1-AP, Proteintech, Rosemont, IL, USA  
 Anti-GFAP mouse monoclonal antibody, CAT# G3893, Sigma-Aldrich, St. Louis, MO, USA  
 Anti-vimentin mouse monoclonal antibody, CAT# V6630, Sigma-Aldrich  
 Anti-parkin mouse monoclonal antibody, CAT# 4211, Cell Signaling Technology, Danvers, MA, USA; clone PRK8  
 Anti-actin mouse monoclonal antibody, CAT# MAB1501, Millipore, Burlington, MA, USA; clone C4  
 Anti-GFAP chicken polyclonal antibody, CAT#AB5541, Millipore, Burlington, MA, USA  
 Anti-S100 $\beta$  mouse monoclonal antibody, CAT# AMAB91038, Sigma-Aldrich  
 Anti-tyrosine hydroxylase (TH) rabbit polyclonal antibody, CAT# 657012, Santa Cruz Biotechnology, Dallas, TX, USA

### Validation

Anti-phosphorylated  $\alpha$ -synuclein mouse monoclonal antibody, CAT# 015-29151: <https://labchem-wako.fujifilm.com/us/product/detail/W01W0101-2519.html>  
 Anti-TH mouse monoclonal antibody, CAT# T2928m: <https://www.sigmaaldrich.com/catalog/product/sigma/T2928?lang=en&region=CA>  
 Anti-nestin rabbit polyclonal antibody, CAT#18741: <https://www.ibl-america.com/nestin-n1602-anti-human-rabbit-igg-affinity-purify/>  
 Anti-GFAP mouse monoclonal antibody, CAT#11051: <https://www.ibl-japan.co.jp/en/search/product/detail/id=3608>  
 Anti-vimentin mouse monoclonal antibody, CAT# GA63061-2J: [https://www.agilent.com/en-us/PageUnavailable?s=//www.agilent.com/en/product/immunohistochemistry/antibodies-controls/primary-antibodies/vimentin-\(dako-omnis\)-76243](https://www.agilent.com/en-us/PageUnavailable?s=//www.agilent.com/en/product/immunohistochemistry/antibodies-controls/primary-antibodies/vimentin-(dako-omnis)-76243)  
 Anti-ALDH1L1 rabbit polyclonal antibody, CAT# 17390-1-AP: <https://www.ptglab.com/products/ALDH1L1-Antibody-17390-1-AP.htm>  
 Anti-GFAP mouse monoclonal antibody, CAT# G3893: <https://www.sigmaaldrich.com/catalog/product/sigma/g3893?lang=en&region=CA>

Anti-vimentin mouse monoclonal antibody, CAT# V6630: <https://www.sigmaaldrich.com/catalog/product/sigma/V6630?lang=en&region=CA>  
 Anti-parkin mouse monoclonal antibody, CAT# 4211: <https://www.cellsignal.jp/products/primary-antibodies/parkin-prk8-mouse-mab/4211>  
 Anti-actin mouse monoclonal antibody, CAT# MAB1501: [https://www.emdmillipore.com/US/en/product/Anti-Actin-Antibody-clone-C4,MM\\_NF-MAB1501?bd=1](https://www.emdmillipore.com/US/en/product/Anti-Actin-Antibody-clone-C4,MM_NF-MAB1501?bd=1)  
 Anti-GFAP chicken polyclonal antibody, CAT#AB5541: [https://www.merckmillipore.com/JP/en/product/Anti-Glial-Fibrillary-Acidic-Protein-Antibody,MM\\_NF-AB5541](https://www.merckmillipore.com/JP/en/product/Anti-Glial-Fibrillary-Acidic-Protein-Antibody,MM_NF-AB5541)  
 Anti-S100 $\beta$  mouse monoclonal antibody, CAT# AMAB91038: <https://www.sigmaaldrich.com/catalog/product/sigma/amab91038?lang=en&region=CA>  
 Anti-tyrosine hydroxylase (TH) rabbit polyclonal antibody, CAT# 657012: [https://www.merckmillipore.com/JP/en/product/Anti-Tyrosine-Hydroxylase-Rabbit-pAb,EMD\\_BIO-657012?ReferrerURL=https%3A%2F%2Fwww.google.com%2F](https://www.merckmillipore.com/JP/en/product/Anti-Tyrosine-Hydroxylase-Rabbit-pAb,EMD_BIO-657012?ReferrerURL=https%3A%2F%2Fwww.google.com%2F)

## Human research participants

Policy information about [studies involving human research participants](#)

|                            |                                                                                       |
|----------------------------|---------------------------------------------------------------------------------------|
| Population characteristics | All participants were Japanese from 50 y/o to 81y/o including 13 males and 4 females. |
| Recruitment                | All participants were accepted autopsy and postmortem research by their families.     |
| Ethics oversight           | The ethics committee of the Juntendo University School of Medicine                    |

Note that full information on the approval of the study protocol must also be provided in the manuscript.
